# Supplementary material for: Identifying the critical state of cancers by single-sample Markov flow entropy
Source: PeerJ journal article supplement (doi:10.7717/peerj.15695), 2023-07-24

### A Network change of ESCA

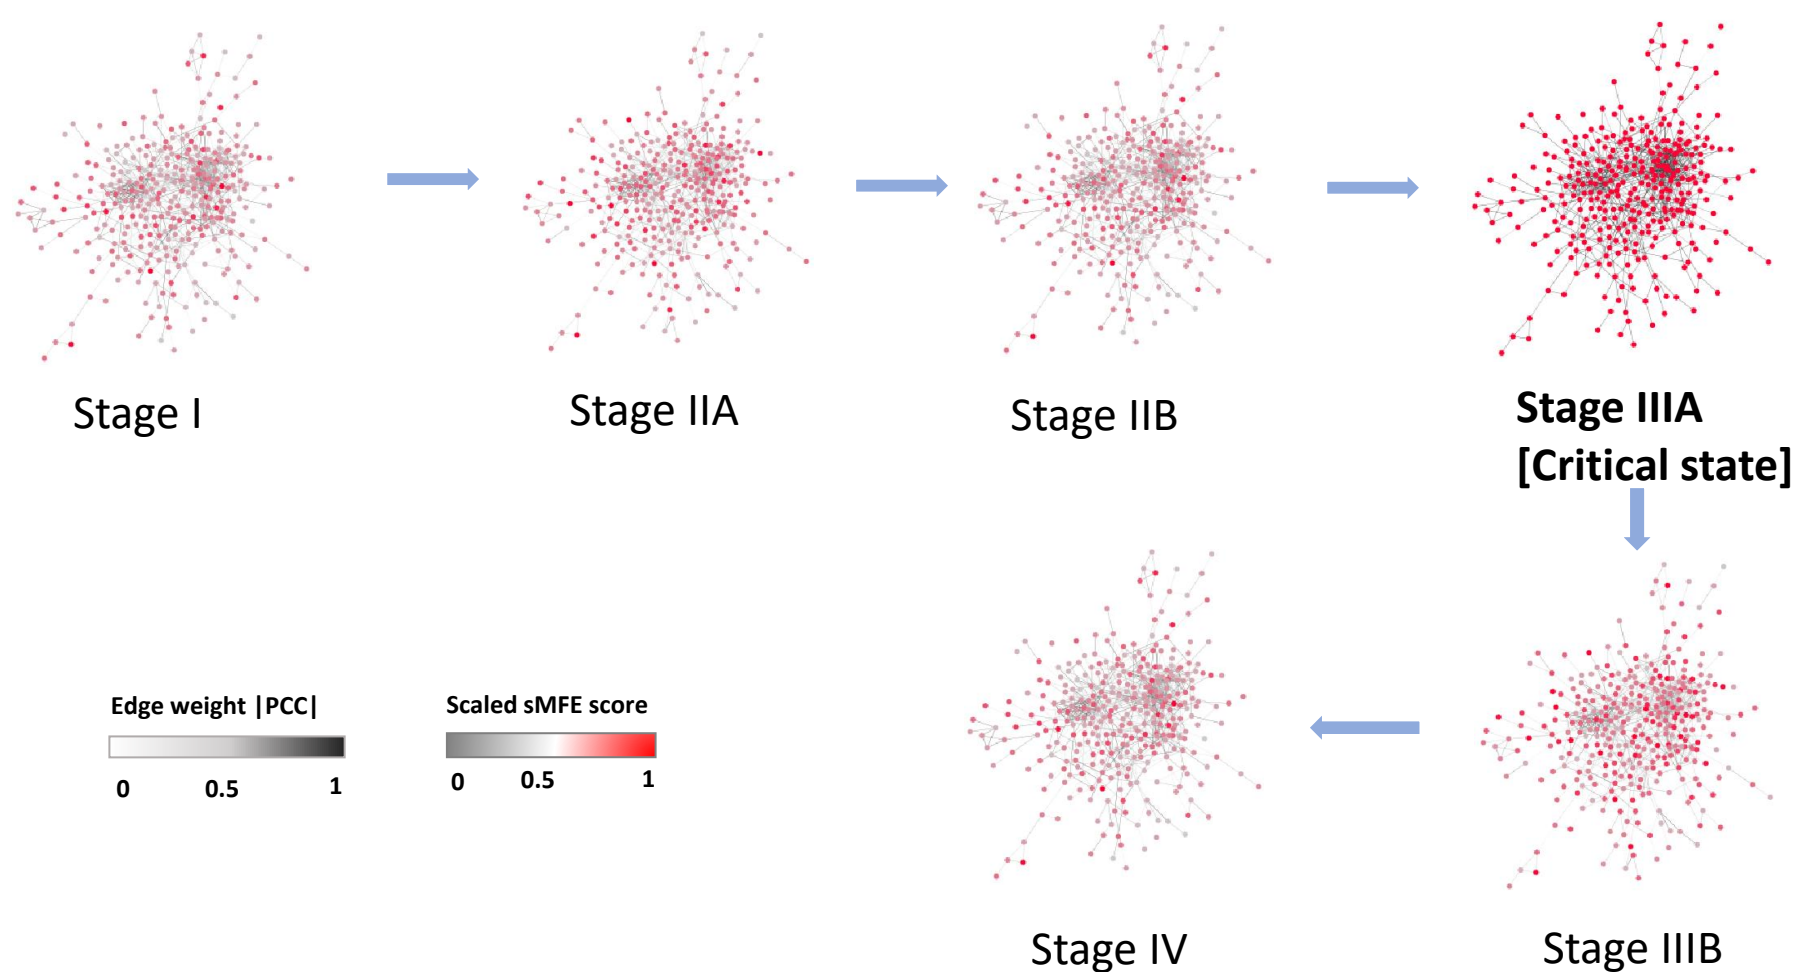

### B Network change of COAD

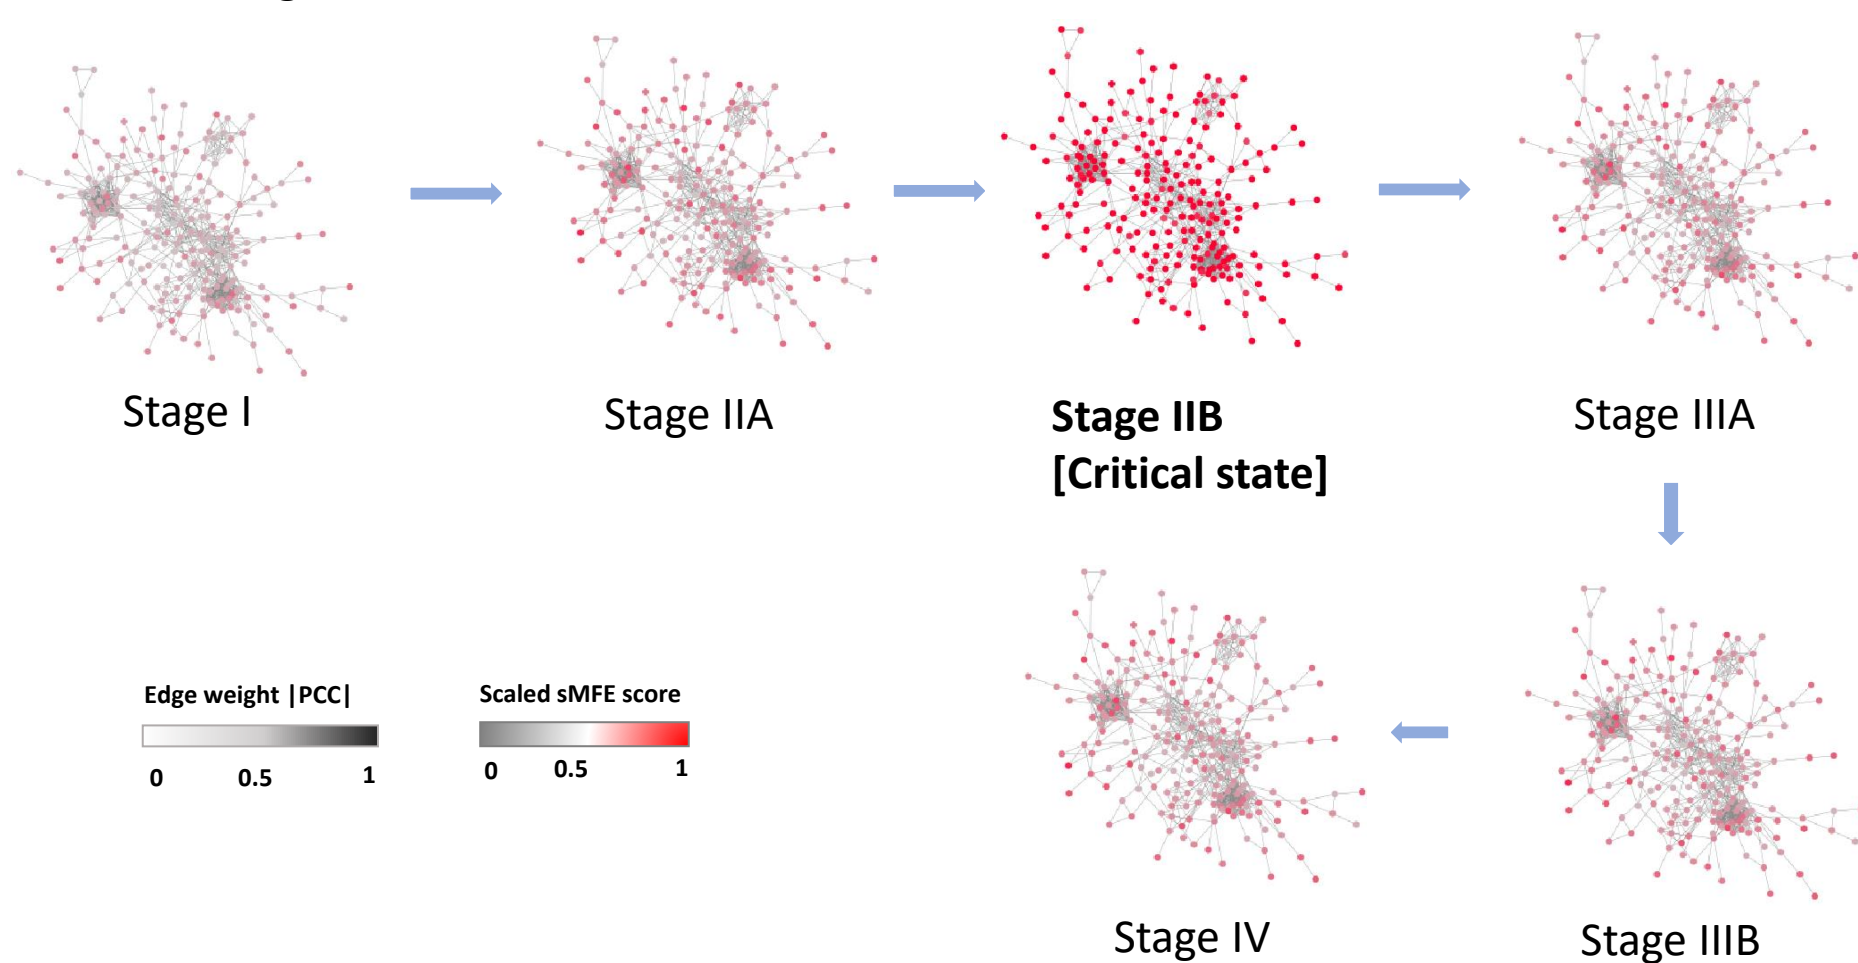

### C Network change of KIRC

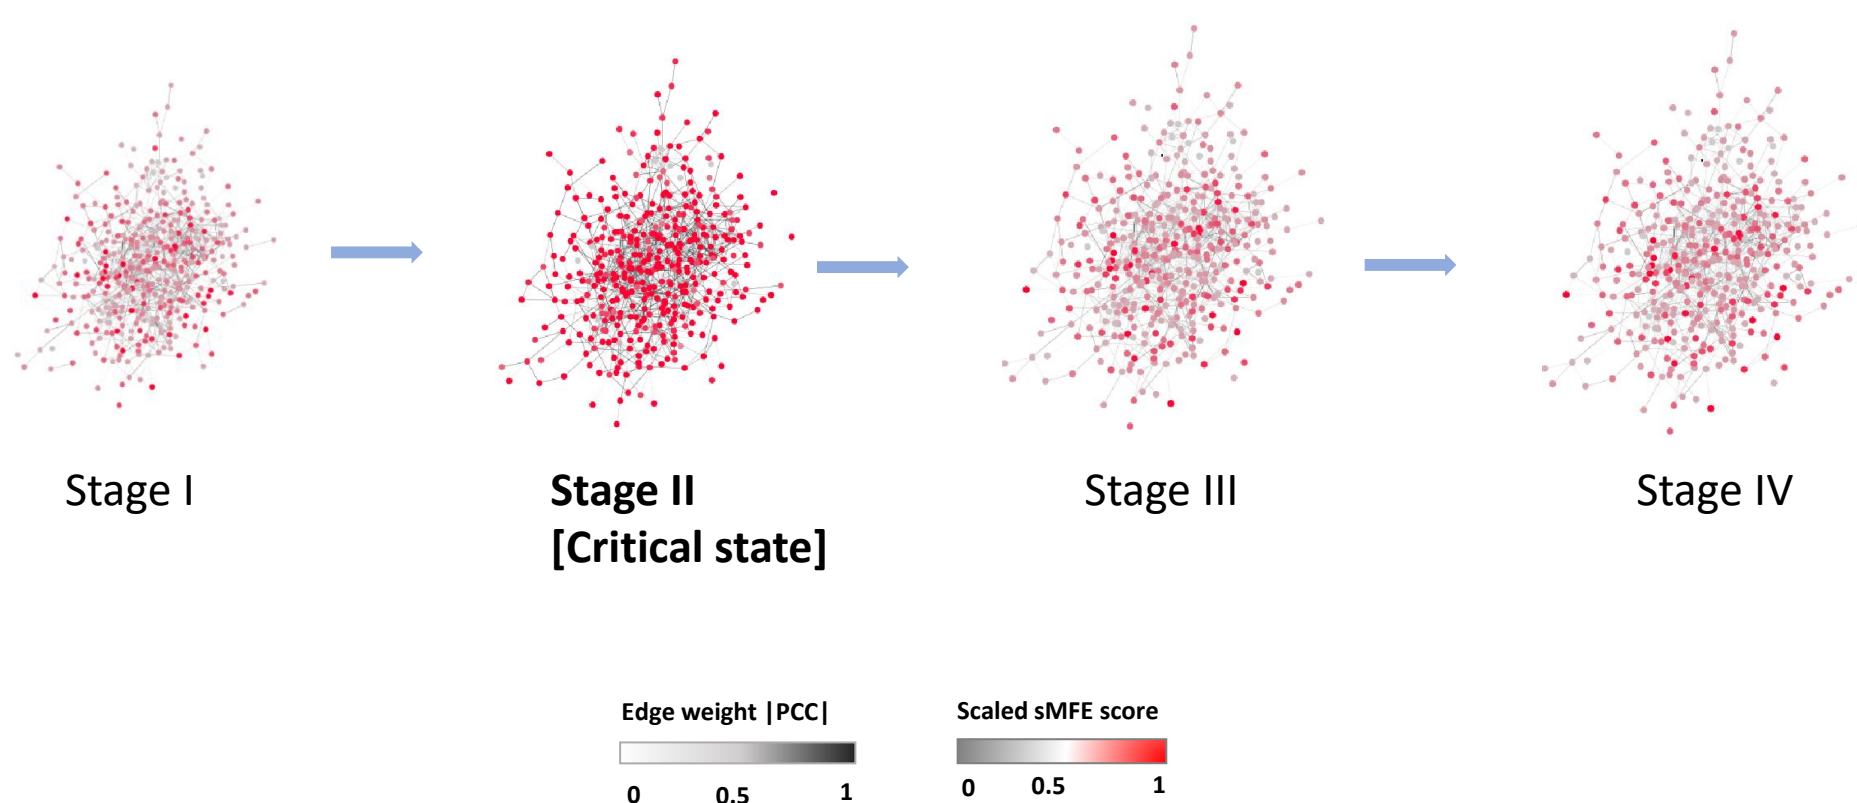

### D Network change of LUAD

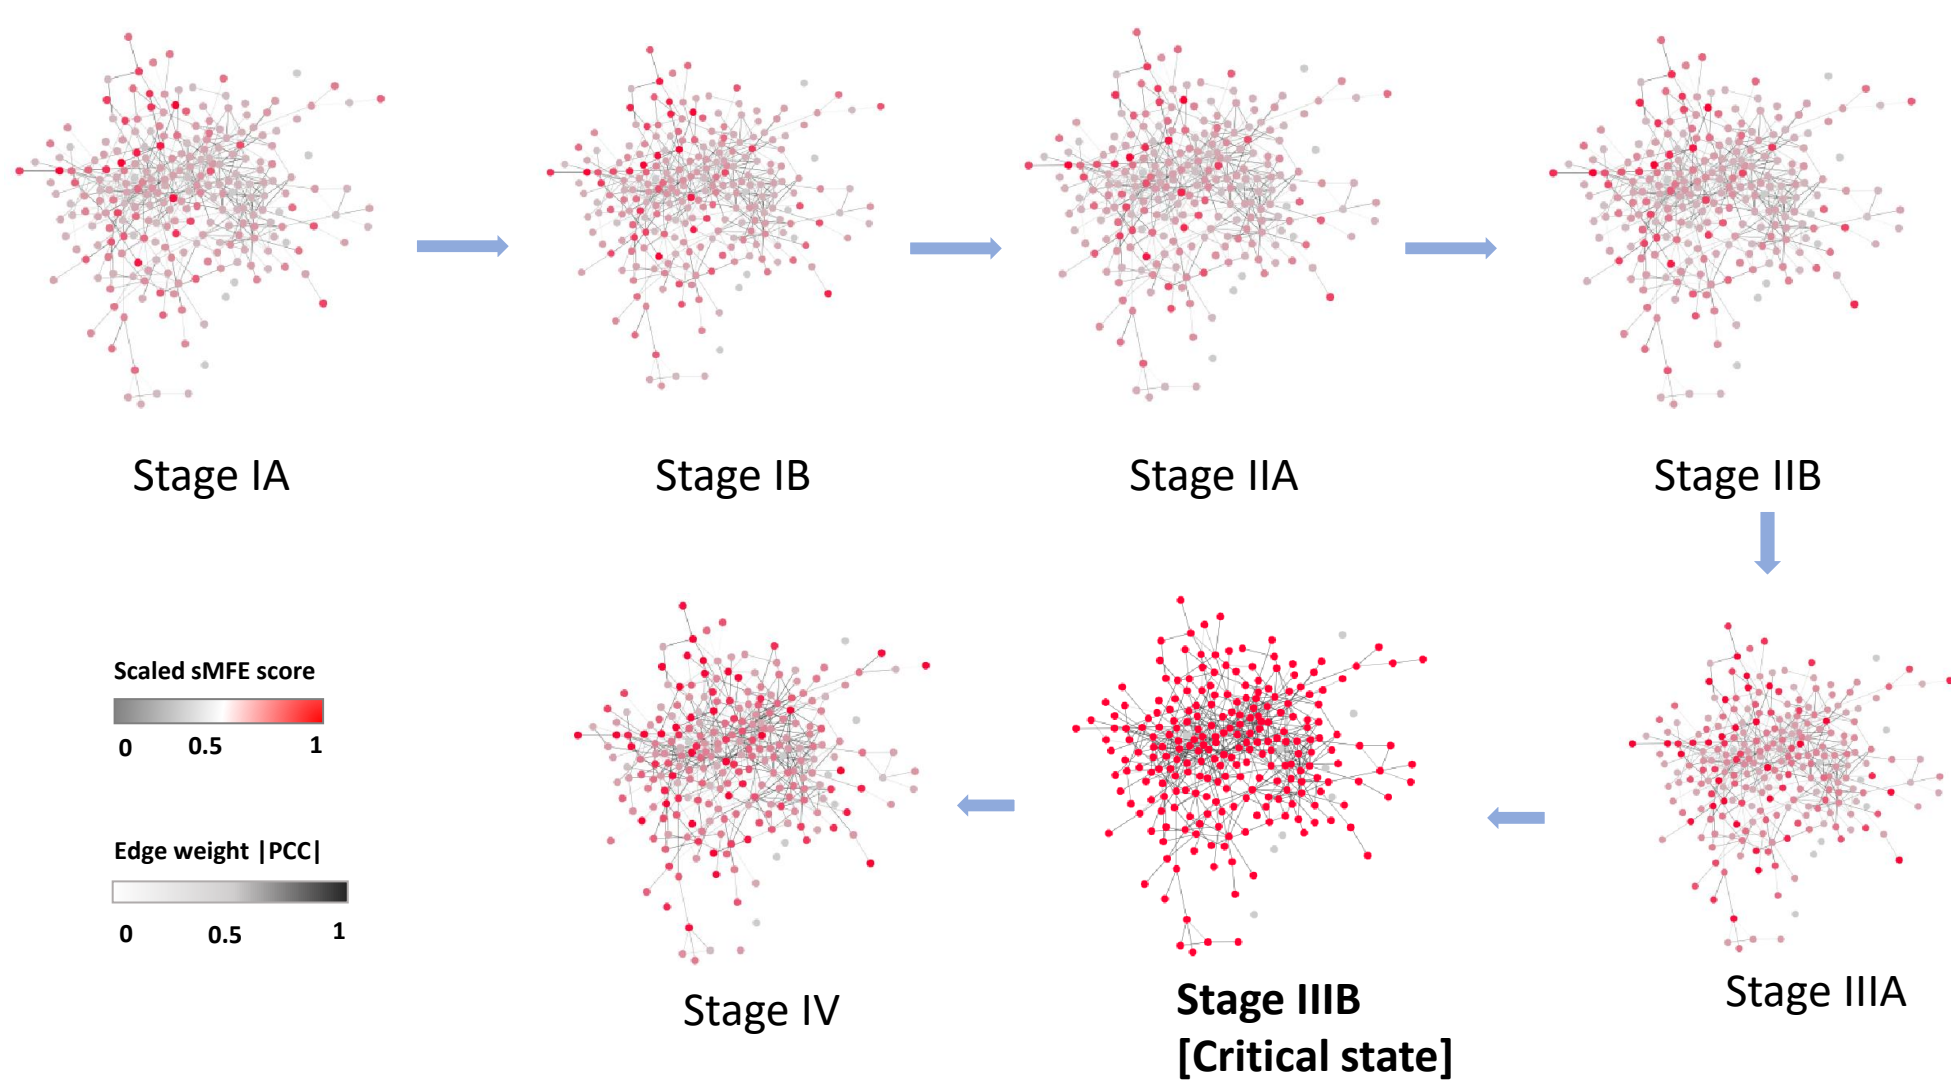

Supplement: FigureS2.pdf [file FigureS2.pdf]
