# Supplementary material for: Identifying the critical state of cancers by single-sample Markov flow entropy
Source: PeerJ journal article supplement (doi:10.7717/peerj.15695), 2023-07-24

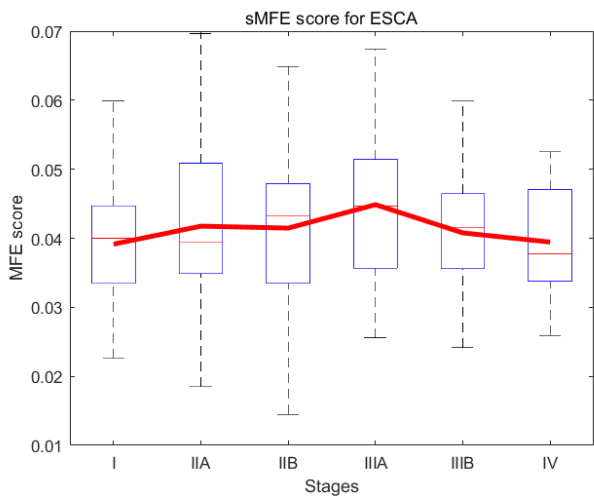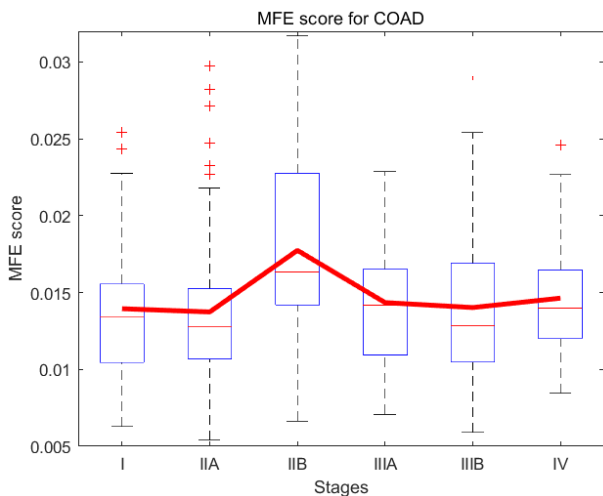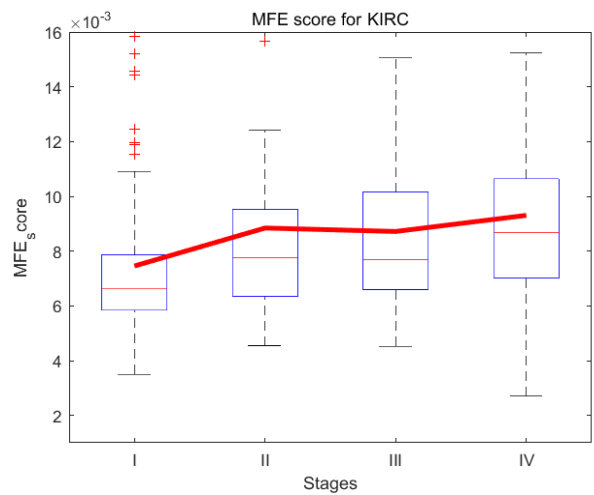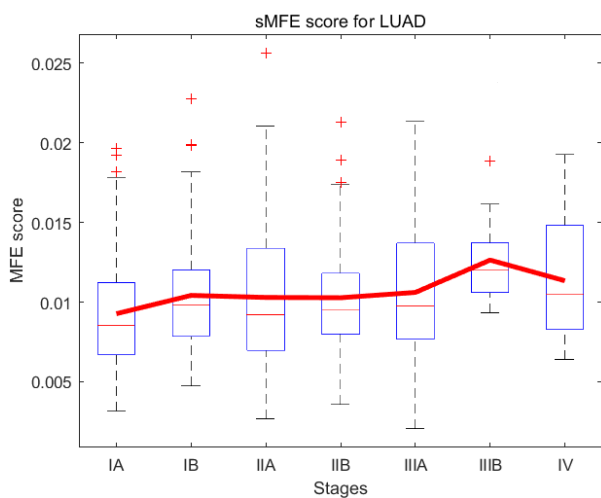

Supplement: FigureS3.pdf [file FigureS3.pdf]
