# Supplementary material for: Identifying the critical state of cancers by single-sample Markov flow entropy
Source: PeerJ journal article supplement (doi:10.7717/peerj.15695), 2023-07-24

sMFE score for LIHC

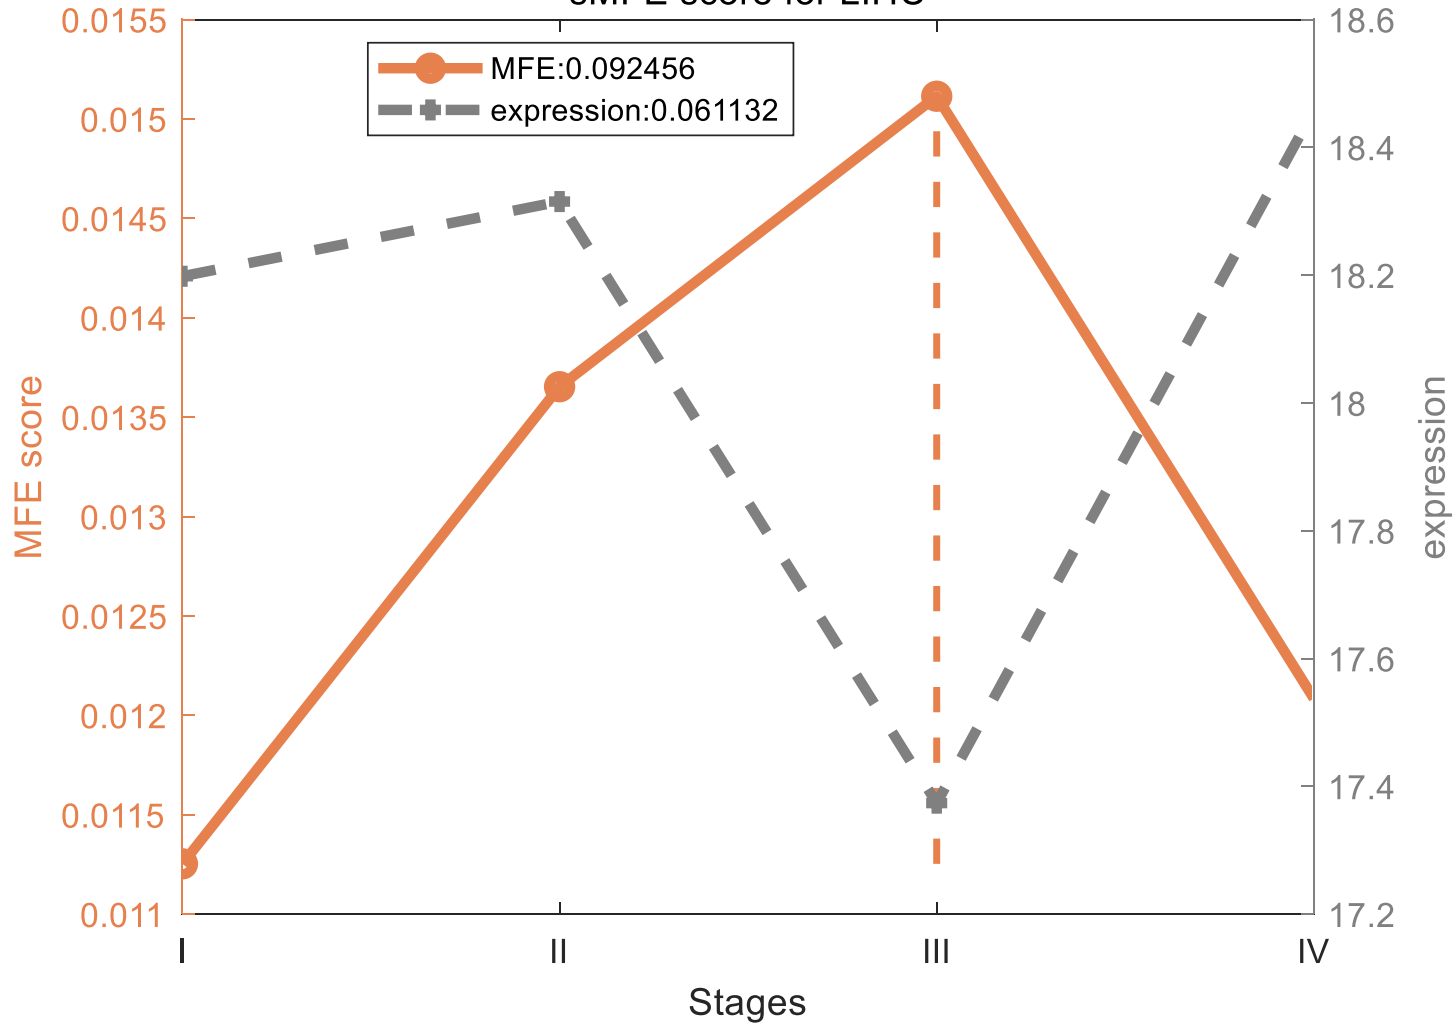

Supplement: FigureS4.pdf [file FigureS4.pdf]
